# Supplementary figures and images for: OSCC in Never-Smokers and Never-Drinkers Is Associated with Increased Expression of Tumor-Infiltrating Lymphocytes and Better Survival
Source: MDPI journal article supplement (doi:10.3390/cancers15102688), 2023-05-10

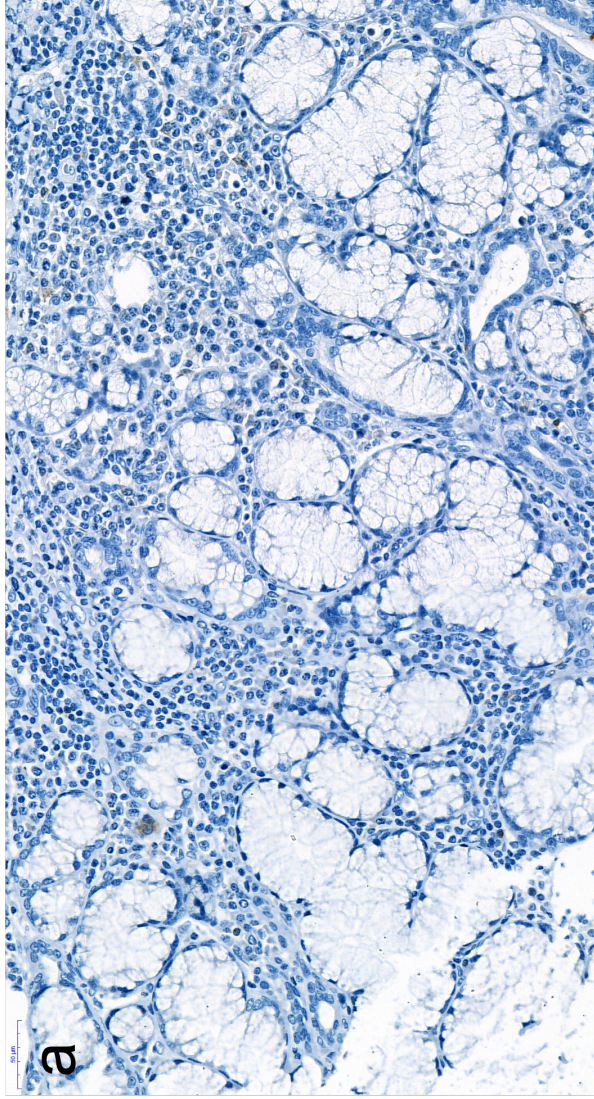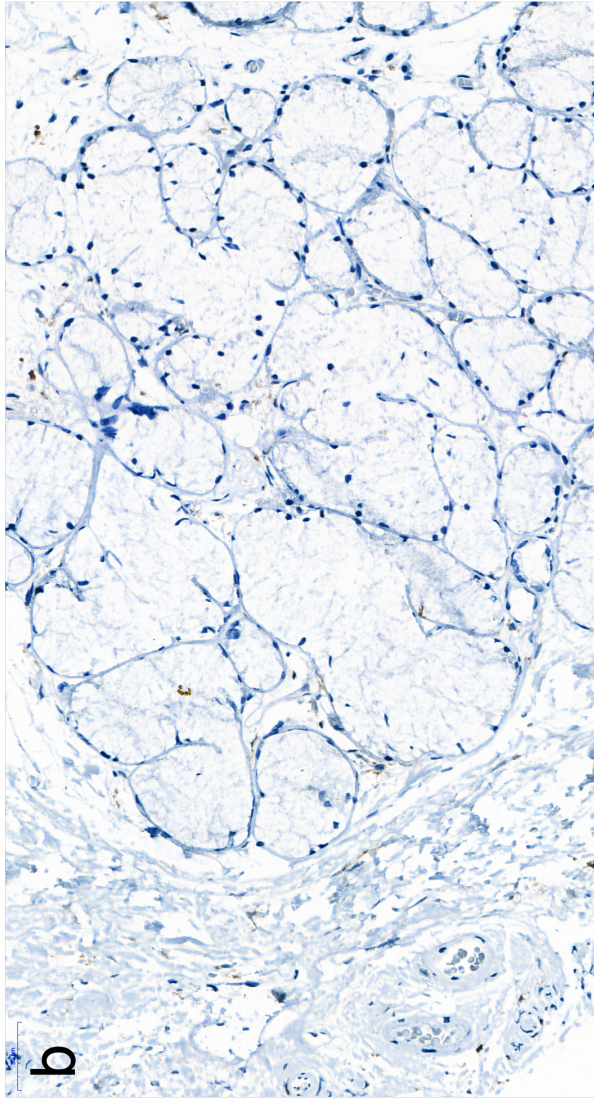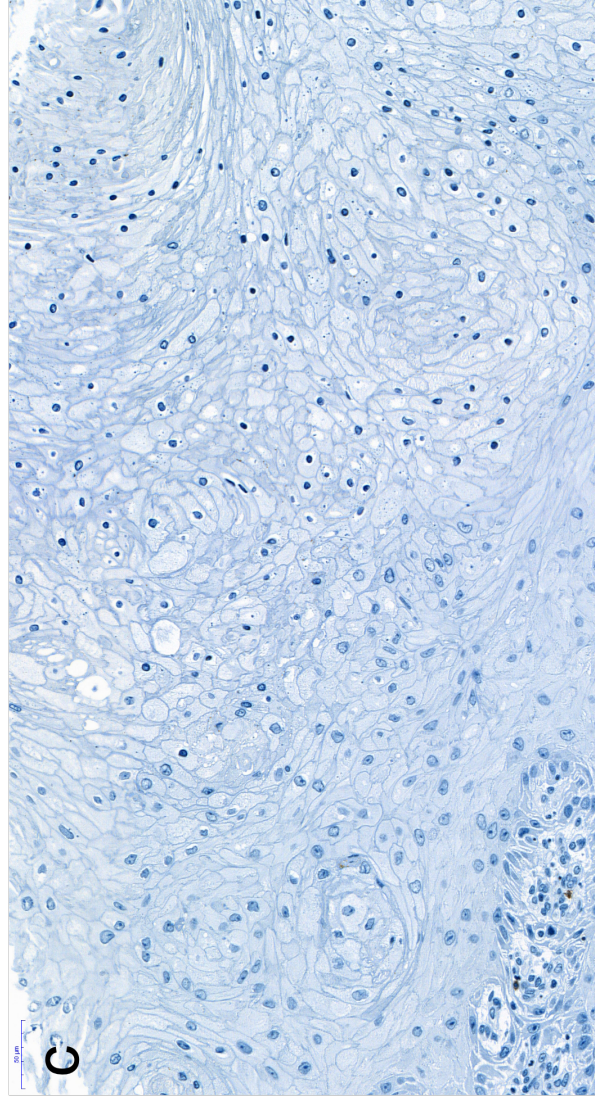

Supplement: s1 [file s1]
